# Supplementary material for: Disrupted tongue microbiota and detection of nonindigenous bacteria on the day of allogeneic hematopoietic stem cell transplantation
Source: PubMed Central journal article supplement (PMC7082065; doi:10.1371/journal.ppat.1008348), 2020-03-09
Supplement: ppat.1008348.s007.pdf [file ppat.1008348.s007.pdf]

1 S2 Table. Incidence of transplant complications in the recipients with the detection of four non-oral bacterial taxa.

|                                          | No. of subjects | No. (%) of recipients with transplant complications <sup>b</sup> |                          |                         | One-year overall survival rate (%) (95% CI) |
|------------------------------------------|-----------------|------------------------------------------------------------------|--------------------------|-------------------------|---------------------------------------------|
| Bacterial taxa <sup>a</sup>              |                 | Oral mucositis <sup>c</sup>                                      | Bacteremia until day+100 | Acute GvHD <sup>d</sup> |                                             |
| <i>Ralstonia pickettii</i> (854)         |                 |                                                                  |                          |                         |                                             |
| Detected                                 | 13              | 7 (53.8)                                                         | 5 (38.4)                 | 5 (38.5)                | 32.3 (13.4–77.5)                            |
| Not detected                             | 32              | 21 (65.6)                                                        | 7 (21.8)                 | 10 (31.2)               | 74.7 (61.0–91.5)                            |
| <i>Staphylococcus haemolyticus</i> (120) |                 |                                                                  |                          |                         |                                             |
| Detected                                 | 8               | 4 (50.0)                                                         | 4 (50.0)                 | 3 (37.5)                | 37.5 (15.3–91.7)                            |
| Not detected                             | 37              | 24 (64.9)                                                        | 8 (21.6)                 | 12 (32.4)               | 69.3 (55.7–86.3)                            |
| Uncultured organism (HQ813300)           |                 |                                                                  |                          |                         |                                             |
| Detected                                 | 8               | 7 (87.5)                                                         | 1 (12.5)                 | 1 (12.5)                | 85.7 (63.3–100)                             |
| Not detected                             | 37              | 21 (56.8)                                                        | 11 (29.7)                | 14 (37.8)               | 59.0 (44.9–77.4)                            |
| <i>Streptococcus thermophilus</i> (152)  |                 |                                                                  |                          |                         |                                             |
| Detected                                 | 6               | 3 (50.0)                                                         | 3 (50.0)                 | 1 (16.6)                | 41.7 (14.6–100)                             |
| Not detected                             | 39              | 25 (64.1)                                                        | 9 (23.0)                 | 14 (35.9)               | 66.5 (53.1–83.1)                            |

17 Only four non-oral taxa identified from more than five recipients were shown. <sup>a</sup>Taxon ID in expanded Human Oral Microbiome database (triple  
 18 digits) or GenBank number is given in parentheses following bacterial name. <sup>b</sup>No significant relationship was observed between the presence of  
 19 each taxon and each complication in Fisher’s exact test. <sup>c</sup>Grade 0 is regarded as absence of oral mucositis. <sup>d</sup>Grade II-IV is regarded as presence of  
 20 acute GvHD.

21 Abbreviation: GvHD, graft-versus host disease

22
