# Supplementary material for: Disrupted tongue microbiota and detection of nonindigenous bacteria on the day of allogeneic hematopoietic stem cell transplantation
Source: PubMed Central journal article supplement (PMC7082065; doi:10.1371/journal.ppat.1008348), 2020-03-09
Supplement: ppat.1008348.s008.pdf [file ppat.1008348.s008.pdf]

1 S3 Table. Relationship between the detection of *Staphylococcus haemolyticus* and/or  
 2 *Ralstonia pickettii* and antibiotics used during pretransplant conditioning.

|                                        | Detection of bacterial taxa                  |                                       |
|----------------------------------------|----------------------------------------------|---------------------------------------|
|                                        | <i>Staphylococcus haemolyticus</i><br>(n= 8) | <i>Ralstonia pickettii</i><br>(n= 13) |
| 7 Prophylactic use (n= 19)             | 0 (0)                                        | 2 (15.3)                              |
| 8 Additional use for treatment (n= 26) | 8 (30.7)                                     | 11 (84.6)                             |
| 9 CFPM (n= 14)                         | 2 (14.2)                                     | 4 (28.4)                              |
| 10 CZOP (n= 1)                         | 0 (0)                                        | 1 (100.0)                             |
| 11 Other antibiotics (n= 11)           | 6 (54.5)                                     | 6 (54.5)                              |
| 12 DRPM (n=1)                          | 1 (100)                                      | 0 (0)                                 |
| 13 CFPM+TAZ/PIPC (n= 2)                | 1 (50)                                       | 1 (50)                                |
| 14 CZOP+TAZ/PIPC (n= 1)                | 1 (100)                                      | 1 (100)                               |
| 15 DRPM+TAZ/PIPC (n= 1)                | 0 (0)                                        | 0 (0)                                 |
| 16 CFPM+TAZ/PIPC+DRPM (n= 1)           | 0 (0)                                        | 1 (100)                               |
| 17 CFPM+TAZ/PIPC+TEIC (n= 1)           | 1 (100)                                      | 1 (100)                               |
| 18 MEPM+TEIC (n= 1)                    | 0 (0)                                        | 1 (100)                               |
| 19 TAZ/PIPC+MEPM+TEIC (n= 2)           | 2 (100)                                      | 1 (50)                                |
| 20 CFPM+DRPM+VCM (n= 1)                | 0 (0)                                        | 0 (0)                                 |

21 CFPM, cefepime; CZOP, ceftazidime; DRPM, doripenem; MEPM; meropenem; TAZ/PIPC;  
 22 tazobactam/piperacillin; TEIC; teicoplanin; VCM; vancomycin.

23  
 24
