# Supplementary material for: Disrupted tongue microbiota and detection of nonindigenous bacteria on the day of allogeneic hematopoietic stem cell transplantation
Source: PubMed Central journal article supplement (PMC7082065; doi:10.1371/journal.ppat.1008348), 2020-03-09
Supplement: ppat.1008348.s009.pdf [file ppat.1008348.s009.pdf]

1 S4 Table. Relationship between the detection of *Staphylococcus haemolyticus* and/or  
 2 *Ralstonia pickettii* and the severity of intestinal GvHD.

|                               | Either/both of the two taxa |              |                              |
|-------------------------------|-----------------------------|--------------|------------------------------|
|                               | Detected                    | Not detected |                              |
|                               | (n= 17)                     | (n= 28)      | <i>P</i> -value <sup>a</sup> |
| 6 Severity of intestinal GvHD |                             |              | 0.742                        |
| 7 Grade 0                     | 14 (82.3)                   | 18 (64.2)    |                              |
| 8 Grade 1                     | 2 (11.7)                    | 7 (25.0)     |                              |
| 9 Grade 2                     | 1 (5.8)                     | 1 (3.5)      |                              |
| 10 Grade 3                    | 0 (0)                       | 2 (7.1)      |                              |

11 <sup>a</sup>Fisher's exact test.

12 Abbreviation: GvHD, graft-versus host disease
