# Supplementary material for: Disrupted tongue microbiota and detection of nonindigenous bacteria on the day of allogeneic hematopoietic stem cell transplantation
Source: PubMed Central journal article supplement (PMC7082065; doi:10.1371/journal.ppat.1008348), 2020-03-09
Supplement: ppat.1008348.s010.pdf [file ppat.1008348.s010.pdf]

1 S5 Table. Incidence of transplant complications in the recipients with the microbiota with  
 2 different alpha diversity (Shannon diversity index).

|                                                   | Shannon diversity index |                        |                         |
|---------------------------------------------------|-------------------------|------------------------|-------------------------|
|                                                   | Low tertile<br>(n= 15)  | Mid tertile<br>(n= 15) | High tertile<br>(n= 15) |
| 6 Oral mucositis <sup>a,c</sup>                   | 7 (46.6)                | 10 (66.6)              | 11 (73.3)               |
| 7 Bacteremia until day+100 <sup>c</sup>           | 4 (26.6)                | 3 (20.0)               | 5 (33.3)                |
| 8 Acute GvHD <sup>b,c</sup>                       | 5 (33.3)                | 4 (26.6)               | 6 (40.0)                |
| 9 One-year overall survival rate (%) <sup>d</sup> | 53.3                    | 64.0                   | 72.7                    |
| 10 (95% CI)                                       | (33.2–85.6)             | (42.9–95.5)            | (53.1–99.6)             |

11 <sup>a</sup>Grade 0 is regarded as absence of oral mucositis. <sup>b</sup>Grade II-IV is regarded as presence of  
 12 acute GvHD. <sup>c</sup>No significant relationship was observed in Fisher's exact test. <sup>d</sup>No significant  
 13 relationship was observed in a log-rank test.

14 Abbreviation: GvHD, graft-versus host disease

15
